# Supplementary material
Source: PubMed Central journal article supplement (PMC128555)
Supplement: pnas_032527099_8.pdf [file pnas_032527099_8.pdf]

**Table 2. Variable temperature UV–Vis studies of 1, 2 and 18C6**

| T, °C            | $\lambda_{\max}$ , nm | Extinction coefficient $\epsilon$ , M <sup>-1</sup> cm <sup>-1</sup> |                 |          |                |       |            |
|------------------|-----------------------|----------------------------------------------------------------------|-----------------|----------|----------------|-------|------------|
|                  |                       | <b>1</b>                                                             | <b>1</b> + NaCl | <b>2</b> | <b>2</b> + KCl | 18C6  | 18C6 + KCl |
| 25               | 238                   | 15,500                                                               | 13,800          | 14,500   | 14,300         | 8,250 | 8,200      |
|                  | 287                   | 8,830                                                                | 7,430           | 8,100    | 7,830          | 3,000 | 3,250      |
| 55               | 238                   | 16,300                                                               | 14,700          | 15,000   | 16,000         | 8,100 | 8,080      |
|                  | 287                   | 9,050                                                                | 7,850           | 8,580    | 8,950          | 3,000 | 3,280      |
| 95               | 238                   | 19,400                                                               | 17,700          | 15,600   | 18,100         | 7,680 | 7,830      |
|                  | 287                   | 10,400                                                               | 9,250           | 8,700    | 10,000         | 2,880 | 3,150      |
| 25<br>(recooled) | 238                   | 18,800                                                               | 17,100          | 15,400   | 16,800         | 8,380 | 8,430      |
|                  | 287                   | 9,980                                                                | 8,750           | 8,280    | 9,100          | 3,200 | 3,480      |

$\lambda_{\max}$  for 18C6 and [18C6 + KCl] are 237 and 295 nm. [1] = [2] = [NaCl] = [KCl] =  $40 \times 10^{-6}$  M in H<sub>2</sub>O.
